# Supplementary material
Source: PubMed Central journal article supplement (PMC1765829)
Supplement: straninf_78_suppl-1_i78__1.pdf [file straninf_78_suppl-1_i78__1.pdf]

1

## Appendix

The structure of the model is represented by the following set of differential equations.

$$\begin{aligned}
 \frac{dX_{ki}^{00}}{dt} &= \Lambda_{ki}(t) - \sigma_{ki} X_{ki}^{01} - (\mu + \lambda_{1ki}(t) + \rho_{ki}(t)) X_{ki}^{00}(t) - C_{ki}^{01}(T2) + R_{ki}^{00}(t) \\
 \frac{dX_{ki}^{10}}{dt} &= \lambda_{1ki}(t) X_{ki}^{00}(t) - \sigma_{ki} X_{ki}^{11} - (\mu + \lambda_{2ki}(t) + \rho_{ki}(t)) X_{ki}^{10}(t) - C_{ki}^{11}(T2) + R_{ki}^{01}(t) \quad (0.2) \\
 \frac{dX_{ki}^{20}}{dt} &= \gamma_1 X_{ki}^{10}(t) - \sigma_{ki} X_{ki}^{21} - (\mu + \gamma_2 + \rho_{ki}(t)) X_{ki}^{20}(t) + C_{ki}^{21}(T2) \\
 \frac{dX_{ki}^{30}}{dt} &= \gamma_2 X_{ki}^{20}(t) - \sigma_{ki} X_{ki}^{31} - (\mu + \gamma_3 + \rho_{ki}(t)) X_{ki}^{30}(t) + C_{ki}^{31}(T2) \\
 \frac{dX_{ki}^{01}}{dt} &= \rho_{ki}(t) X_{ki}^{00}(t) - (\mu + \sigma_{ki} + \lambda_{2ki}(t)) X_{ki}^{01}(t) - C_{ki}^{01}(T1) \\
 \frac{dX_{ki}^{11}}{dt} &= \lambda_{2ki}(t) X_{ki}^{01}(t) - \rho_{ki}(t) X_{ki}^{10}(t) - (\mu + \sigma_{ki} + \gamma_2) X_{ki}^{11}(t) - C_{ki}^{11}(T2) \\
 \frac{dX_{ki}^{21}}{dt} &= \gamma_1 X_{ki}^{11}(t) - \rho_{ki}(t) X_{ki}^{20}(t) - (\mu + \sigma_{ki} + \gamma_2) X_{ki}^{21}(t) - C_{ki}^{21}(T2) \\
 \frac{dX_{ki}^{31}}{dt} &= \gamma_2 X_{ki}^{21}(t) - \rho_{ki}(t) X_{ki}^{30}(t) - (\mu + \sigma_{ki} + \gamma_3) X_{ki}^{31}(t) - C_{ki}^{31}(T2) \quad (0.8) \\
 \frac{dX_{ki}^{40}}{dt} &= \gamma_3 X_{ki}^{30}(t) - \sigma_{ki} X_{ki}^{41} - (\mu + \alpha) X_{ki}^{40}(t) - C_{ki}^{41}(T2) \quad (0.9) \\
 \frac{dX_{ki}^{41}}{dt} &= \gamma_3 X_{ki}^{31}(t) - (\mu + \sigma_{ki} + \alpha) X_{ki}^{41}(t) - C_{ki}^{41}(T2) \quad (0.10)
 \end{aligned}$$

Screening and treatment of Gc:

With:  $C_{ki}^{h1}(T2) = C_{ki} \% \cdot F_{ki} X_{ki}^{h1}(t) \cdot \mathbb{1}_{\{t \geq \theta_1\}}, \forall h, k,$

$$\text{for } \theta: \begin{cases} t & \text{if } t \neq T2 \\ T2 & \end{cases}$$

Condom use per partnership:

$$\begin{aligned}
 \beta_{k,i,j}^{new,h}(t) &= (Cond_k(T2) \% \cdot \mathbb{1}_{\{t \geq \theta_2\}}) \cdot 1 - (Cond_{k',j,i}(T1) \% \cdot \mathbb{1}_{\{t \geq \theta_1\}}) \beta_{k,i,j}^h \\
 \xi_{new,k} &= Cond_{k',j,i}(T2) \% \cdot \mathbb{1}_{\{t \geq \theta_2\}} - (Cond_{k',j,i}(T1) \% \cdot \mathbb{1}_{\{t \geq \theta_1\}}) \xi_{k,i,j},
 \end{aligned}$$

$\forall h, k$

2

with  $Cond_{k',j,i}(t) = Cond_{k,i,j}(t) \forall k, i, j$

$$\text{for } \theta_1: \begin{cases} t & \text{if } t \neq T1 \\ T1 - 1 & \text{if } t \geq T1 \end{cases}$$

$$\text{for } \theta_2: \begin{cases} t & \text{if } t \neq T2 \\ T2 - 1 & \text{if } t \geq T2 \end{cases}$$

Here  $X_{ki}^{hs}(t)$  represents the number of individuals of sex  $k$  ( $k = 1$ : female;  $k = 2$ : male) and activity class  $i$  ( $i = 1$ : low rate of partner change;  $i = 2$ : higher rates of partner change) in disease states  $h$  (HIV status) and  $s$  (STD status) at time  $t$ . An individual is in state  $h = 0$  if susceptible to HIV, in state  $h = 1$  if in phase 1 of HIV infection, in state  $h = 2$ , or  $h = 3$  if in phase 2 and 3 of HIV infection respectively. An individual in state  $h = 4$  is diagnosed with full blown AIDS. An individual is susceptible to the STD if  $s = 0$  and currently infected with the STD if  $s = 1$ .  $C_{ki}$  represents the fraction of individuals in risk group  $k, i$  screened/diagnosed and treated at time  $T2$  (coverage).  $F_{ki}$  is the frequency of screening in activity class  $i$  of sex  $k$  per year.  $Cond_{k,i,j}(T1)$  and  $Cond_{k,i,j}(T2)$  are the fraction of individuals  $k, i$  who start using condoms in partnership with someone of opposite sex  $k'$  and activity class  $j$  at time  $T1$  and  $T2$ .

An individual susceptible to both infections ( $X_{ki}^{00}(t)$ ) can get infected either by the STD or HIV at a rate  $\rho_{ki}(t)$  (eqn 0.7) and  $\lambda_{1ki}(t)$  (eqn 0.8) respectively. It is assumed that HIV positives and negatives are equally likely to acquire an STD infection. However, HIV negative individuals ( $X_{ki}^{01}(t)$  or  $X_{ki}^{00}(t)$ ) are more likely to get HIV from HIV-STD  $X_{ki}^{11}(t)$ ,  $X_{ki}^{21}(t)$ ,  $X_{ki}^{31}(t)$  partners. STD positive individuals ( $X_{ki}^{01}(t)$ ) are more susceptible to infection with HIV ( $\lambda_{2ki}(t)$ ) (eqn 0.9). At time  $t = 0$  (i.e. 1980),  $\sum_{i=1}^2 X_{1i}^{00}(0) = 122605$

and  $\sum_{i=1}^2 X_{2i}^{00}(0) = 115558$  and the HIV epidemic is seeded with  $X_{11}^{10}(0) = 1, X_{12}^{10}(0) = 2, X_{21}^{10}(0) = 1, X_{22}^{10}(0) = 1$  while the STD is already at its initial equilibrium prevalence before the introduction of HIV. The other state variables are equal to 0. Once infected, an STD positive of sex  $k$  and activity class  $i$  remains infected and infectious for a period of time of  $1/\sigma_{ki}$  respectively after which period, the individual joins the susceptible class again. Whether STD positive or negative, HIV seroconverters remain symptomless for an average period of time  $(1/\gamma_1 + 1/\gamma_2 + 1/\gamma_3)$  before progressing to the AIDS stage. Individuals in the population die at a natural rate  $\mu$  ( $\mu = \text{average sexual life expectancy}$ ). The AIDS related mortality,  $\alpha$  is equal to  $1/\text{life expectancy of patient with full blown AIDS}$ .

The per capita rate of STD infection is defined as follows:

$$\rho_{ki}(t) = m_{ki}(t) \sum \xi_{new_{k'ji}} \varphi_{kij}(t) \frac{\sum_{h=0}^3 X_{k'j}^{h1}(t)}{\sum_{hs} X_{k'j}^{hs}(t) + \sum_s X_{k'j}^{4s}(t)} \quad (0.11)$$

The per capita rates of HIV infection for those without (STD) and with (STD) current infection with the cofactor STD are defined as follows:

$$\lambda_{1ki}(t) = m_{ki}(t) \sum \varphi_{kij}(t) \frac{\sum_{h=1}^3 \beta_{new_{k'ji}^h} (X_{k'j}(t)^{h0} + RR_{HIV/STD} \cdot X_{k'j}(t)^{h1}(t))}{\sum_{hs} X_{k'j}^{hs}(t) + \sum_s X_{k'j}^{4s}(t)} \quad (0.12)$$

$$\lambda_{2ki}(t) = RR_{HIV/STD} \cdot \lambda_{1ki}(t) \quad (0.13)$$

As seen in equations (0.7-0.8), the rates of infection depend on the annual rate of partner acquisition ( $m_{ki}(t)$ ) at time  $t$  of an individual of sex  $k$  and sexual activity level  $i$ ; the probability of choosing an infected partner, which is a function of the mixing pattern  $\varphi_{kij}(t)$

4

(the probability that a member of class  $i$  and sex  $k$  has selected a partner of sex  $k'$  and class  $j$  at time  $t$ ); the probability that this partner is infected (prevalence of infection in risk group  $k,i$ ); and the per partner transmission probability of the STD ( $\xi_{new_{k'ji}}$ ) or HIV ( $\beta_{new_{ji}}$ ) from a partner of sex  $k'$ , activity class  $j$  to a susceptible of sex  $k$  and activity class

AIDS patients are assumed not to contribute to transmission because of the severity of their illness. The term  $RR_{HIV/STD}$  in (0.13) and in the right hand side of (0.12) represents the relative increase in HIV susceptibility of HIV<sup>-</sup> STD<sup>-</sup> and in infectivity of STD<sup>+</sup>/HIV<sup>+</sup> respectively.

New recruits join the susceptible sexually active population at a rate  $\Lambda_{ki}(t)$ . The expression for the new recruits to the sexually active population is:

$$\Lambda_{ki}(t) = Q_{ki} R P f \left[ X_{1i}^{01}(t - \tau) + X_{1i}(t - \tau) (1 - \gamma) \left( X_{ki}^{10}(t) + X_{ki}^{11}(t) + X_{1i}^{20}(t - \tau) + X_{1i}^{21}(t - \tau) \right) \right] \quad (0.14)$$

Here  $Q_{ki}$  is the initial distribution in sexual activity for each sex in the absence of AIDS induced mortality.  $R$  denotes the sex ratio (assumed to be 1:1 at birth which gives  $R = 0.5$ ).  $f$  denotes the per capita birth rate of sexually active women ( $f=0.3$ ).  $P$  is the proportion of uninfected infants who survive to join the sexually active age classes [49] ( $P = \exp^{-b\tau}$  where  $\tau$  is the age at sexual maturity (15 years) and  $b$  is the death rate over the interval  $[0,\tau]$ ). The net rate of prostitute renewal is given by

$$R_{ki}^{00} = \gamma \cdot X_{ki}^{30}(t)/2, \text{ for } k = 1, i = 2 \quad (0.15)$$

$$R_{ki}^{00} = 0, \text{ otherwise} \quad (0.16)$$

5

$$R_{ki}^{01} = \gamma_3 X_{ki}^{31}(t)/2 \quad \text{or } k = i \quad (0.17)$$

$$R_k^0 = 0, \text{ otherwise} \quad (0.18)$$

We define the elements of the mixing matrix as [49]

$$\varphi_{kij} = \frac{W_{kij} (N_{k'j}^+(t) - N_{k'j}^-(t)) m_{k'j}(0)}{\sum W_k (N_{k'j}^+(t) - N_{k'j}^-(t)) m_{k'j}(0)} \quad (0.19)$$

The  $W_k$  define a set of weights which represent the preference of someone of sex  $k$  in activity class  $i$  for someone of the opposite sex in activity class

The elements of the mixing matrix  $\varphi_{kij}(t)$  must satisfy the following constraint [49]

$$\sum_i \varphi_{kij}(t) = 1 \quad (0.20)$$

$$\sum_j \varphi_{kij}(t) = 1$$

$$N_{ki}^-(t) - N_{ki}^+(t) = \sum_j \varphi_{kij}(t) (N_{k'j}^+(t) - N_{k'j}^-(t)) m_{k'j}(0) \quad (0.22)$$

As described in ref [49] we adopt a procedure which the mean rate of partner change in the lowest female activity group remains unchanged (for all  $t$ ) to act as a reference point to define a rate of change as mortality influences population size and structure (condition (0.22) to hold) and  $k$  at the cross product the preference matrix (hence the mixing matrix) should be equal for males and females (details in ref [49])

For Cotonou we used the weights:  $W_{111}(1980) = 3.335$ ,  $W_{112}(1980) = 3.335$ ,  $W_{121}(1980) = 3.335$ ,  $W_{122}(1980) = 3.335$ ,  $W_{211}(1980) = 17$ ,  $W_{212}(1980) = 17$ ,  $W_{221}(1980) = 6.5$ ,  $W_{222}(1980) = 6.5$ . The corresponding elements of the mixing matrix are given in Table 1. We also use the following

SGAN only 20ms

6

SCAN ONLY

201010

recovery rate of Gc:  $\sigma_{11} = 5.5, \sigma_{12} = 8.8, \sigma_{21} = 5.5, \sigma_{22} = 8.8$  For the high prevalence scenario we used the weights:  $W_{111}(1980) = 2, W_{112}(1980) = 1, W_{211}(1980) = 2, W_{212}(1980) = 1$  and  $W_{221}(1980) = 1, W_{222}(1980) = 1$ . To obtain the same Gc equilibrium prevalence in 1980 than for Cotonou, the following Gc recovery rates were used:  $\sigma_{11} = 6.5, \sigma_{12} = 8.4, \sigma_{21} = 6.5, \sigma_{22} = 8.4$ .

20ms
